# Supplementary material
Source: publisher site journal article supplement (https://www.dovepress.com/article/397038)
Supplement: Supplementary file 1 [file get_supplementary_file.php]

**Appendices, Supplementary Information**

**Appendix 1.** Initial document designed by the core group and the results of the first round of qualifications by the group of clinical experts

| **Item No.** | **Statement** | **Median appropriateness rating** | **Disagreement (IPR>IPRAS)** |
| --- | --- | --- | --- |
| 1 | To define pain and edema of a joint as elements of RA activity, the signs of inflammation are: pain, erythema, or increased temperature | 6.0  (Uncertain) | YES |
| 2 | To define inflammation of a joint as an element of RA activity, other signs of inflammation are important, in addition to the previous point, such as: joint effusion, inflammation of soft tissues over the joint, pain on passive mobilization, pain on palpation and spontaneous pain when moving the joint | 9.0  (Appropriate) | NO |
| 3 | Developing passive mobility of a joint and finding it painful without edema or tenderness, defines it as swollen and painful | 4.5  (Uncertain) | YES |
| 4 | To define pain and swelling of the shoulder, hip, and midtarsal joints in RA activity, it is to assessed with passive mobilization of the joint | 8.0  (Appropriate) | NO |
| 5 | To define pain and swelling of a joint in RA activity, it is palpated by pressure. | 9.0  (Appropriate) | NO |
| 6 | Asking about spontaneous pain in a joint to define if it is painful when determining RA activity | 6.5  (Uncertain) | NO |
| 7 | Asking about spontaneous pain in the hip and shoulder joints to define if they are painful, since they are difficult to palpate | 7.0  (Appropriate) | NO |
| 8 | In case of doubt of pain by the patient when the joint is palpated or if there are gradations of pain (“little pain” or “some pain”), it is included as tenderness (since the answer is either “YES” or “NO”). | 8.0  (Appropriate) | NO |
| 9 | Chronic synovitis or pannus is included in the definition of joint inflammation on examination of a joint | 7.5  (Appropriate) | YES |
| 10 | Pain on examination of a joint is not included when it coexists in a patient with fibromyalgia | 4.5  (Uncertain) | YES |
| 11 | The joint examination not includes the evaluation of pain in the compromised joints when it coexists in the patient with RA and neurological alterations that affect sensitivity | 7.0  (Appropriate) | YES |
| 12 | Defining the site of the joint where is palpated when searching for pain and swelling, which is at the joint margin (the area of ​​insertion of the synovial membrane) | 9.0  (Appropriate) | NO |
| 13 | The degree of pressure on the joint when examining for pain is define as until the examiner's nail bed begins to pale (the "Rule of Thumb") | 9.0  (Appropriate) | NO |
| 14 | Considering joint deformity or misalignment from disease damage when determining tenderness | 8.0  (Appropriate) | NO |
| 15 | Considering joint deformity or misalignment due to disease damage to determine swelling | 8  (Appropriate) | NO |
| 16 | Examine the joint first for swelling and then for tenderness to avoid bias from initial pain. | 7.0  (Appropriate) | NO |
| 17 | Considerate the position of the patient during the physical examination of the joints | 9.0  (Appropriate) | NO |
| 18 | The order or sequence of the group of joints to be examined: descending, ascending, one hemibody first and then the other hemibody, by region, etc. | 8.5  (Appropriate) | NO |
| 19 | The joint is excluded from examination if it has a recent prosthesis, trauma or surgery | 9.0  (Appropriate) | NO |
| 20 | When examining the temporomandibular joint for pain and swelling, the joint is pressed with the index or ring finger | 9.0  (Appropriate) | NO |
| 21 | When examining the acromioclavicular joint for tenderness and swelling, one hand is used, pressing on the joint with the thumb and placing the other fingers on the back of the shoulder | 9.0  (Appropriate) | NO |
| 22 | When examining the sternoclavicular joint for tenderness and swelling, the joint is pressed with the index finger or thumb | 9.0  (Appropriate) | NO |
| 23 | Technique A to examine the shoulder or glenohumeral joint, mobilization, observation and joint palpation are performed.  a. The examiner keeps the patient's arm slightly flexed and performs a passive abduction movement of the shoulder, from zero to 50 degrees, the patient is asked about pain and if it is positive, it is defined that there is joint pain.  b. For swelling, carefully observe for edematousness and palpate the humeral head with the thumb at the joint margin descending over from the coracoid. | 8.0  (Appropriate) | NO |
| 24 | Technique B for examination of the shoulder or glenohumeral joint to search for pain and edema: the head of the humerus is palpated with the thumb at the joint margin, descending from the coracoid process | 7.0  (Appropriate) | NO |
| 25 | Technique C of the shoulder or glenohumeral joint: it is observed and palpated, separately. a. To assess edema, inspection of the shoulder, and b. palpate to assess tenderness or swelling (which allows detecting the presence of increased local warmth or edema, and also pain) | 7.0  (Appropriate) | NO |
| 26 | Technique A for examining the elbow consists of: standing behind the patient and flexing the elbow 70 to 80 degrees and palpating with the thumb of one hand at the joint between the olecranon and the lateral epicondyle and with the fingers of the other hand on the antecubital fossa | 7.0  (Appropriate) | YES |
| 27 | Technique B of elbow examination consists of standing in front of the patient and flexing his elbow between 70 to 80 degrees, palpating with the thumb of one hand the joint between the olecranon and the lateral epicondyle, and with the other hand holding the forearm or the patient's hand | 9.0  (Appropriate) | NO |
| 28 | Regarding the examination of the wrist joint: it is placed in a neutral position, palpating the dorsal surface with the thumbs and the ventral surface with the index fingers, then dorsal flexion and palmar flexion movements are performed in a range of 10 to 20 degrees, while applying pressure | 9.0  (Appropriate) | NO |
| 29 | Technique A of the metacarpophalangeal joints: "The Two-Finger technique." The articular margins of each joint (flexed approximately 50 degrees) are palpated with the index finger and thumb. The other hand is used to support the patient's hand. | 7.0  (Appropriate) | NO |
| 30 | Technique B for examining the metacarpophalangeal joints: With the patient's hand outstretched, each joint at the left and right anterior articular margins is palpated with the pads of both thumbs, while the other fingers of both hands support the patient's hand. | 9.0  (Appropriate) | NO |
| 31 | Technique C of the metacarpophalangeal joints: "The technique of the four fingers", the examined finger is kept in slight flexion and with the first two fingers of one hand of the examiner, the proximal margin of the joint is palpated and with the first two fingers of the other hand palpate the distal margin of the joint | 6.0  (Uncertain) | YES |
| 32 | Technique A for examination of the proximal or distal interphalangeal joints: With the patient's hands extended, the medial and lateral joint margins are palpated with the examiner's index finger and thumb of one hand, with the other hand serving as a support. Alternating pressure is exerted on the articular surface | 8.5  (Appropriate) | NO |
| 33 | Technique B of the proximal or distal interphalangeal joints: with the patient's hands extended, the distal and proximal anterior joint margins are palpated with the examiner's thumbs | 7.0  (Appropriate) | YES |
| 34 | Technique A of examining the hips: they are not examined directly and the patient is asked about pain in the groin when making spontaneous movements. If positive, joint pain but no joint swelling is determined | 6.0  (Uncertain) | YES |
| 35 | Technique B of examination of the hips: they are examined with passive movements of flexion and extension. If there is pain, it is concluded that the hips are tenderness | 8.0  (Appropriate) | NO |
| 36 | When examining the knee joints: with the knees extended, a. The index finger (or ring finger) and thumb of one hand are placed at the midpoint of the medial and lateral tibiofemoral joint margins, allowing joint tenderness and swelling to be detected (both hands may be needed with large knees). then b. One hand is used to evacuate the suprapatellar recess, while the thumb and middle finger of the other hand are evacuated the patellofemoral joint margins, allowing detection of joint swollen | 9.0  (Appropriate) | NO |
| 37 | Regarding the examination of the ankle joint: the index finger or thumb of the hand being examined is placed between the tendons of the extensor hallucis longus (tendon of the extensor hallucis longus) and the digitorum longus (tendon of the extensor hallucis longus). ) which allows to define tenderness or swelling | 9.0  (Appropriate) | NO |
| 38 | Technique A of examination of the medial tarsal joint: mobilization is performed without palpation: the ankle joint is fixed anteriorly with one hand. The index, middle and thumb fingers of the other hand are placed on both sides of the midfoot, and inversion and eversion movements of the joint are made. | 8.0  (Appropriate) | NO |
| 39 | Technique B of examination of the medial tarsal joint: palpation without mobilization. The thumbs of both hands are used to palpate the dorsal surface of the midtarsal joint | 8.0  (Appropriate) | NO |
| 40 | When examining the metatarsophalangeal joints: each joint is examined separately, palpating with the index finger of the examining hand at the articular margin of the dorsal surface and with the thumb at the articular margin of the ventral surface | 9.0  (Appropriate) | NO |
| IPR: Interpercentile range. IPRAS: interpercentile range adjusted for symmetry. | | | |

**Appendix 2.** Result of the second round

| **Item No.** | **Statement** | **Median appropriateness rating** | **Disagreement IPR>IPRAS** |
| --- | --- | --- | --- |
| 1 | To define tenderness or swelling of a joint as elements for RA activity, signs of inflammation are: swelling or tumor, pain, erythema or redness, or increased temperature (heat) | 6.0  (Uncertain) | YES |
| 2 | To define inflammation of a joint as an element of RA activity, the manifestations are: joint effusion, edema of soft tissues of the joint, pain with passive mobilization, pain on palpation or spontaneous pain when moving the joint | 8.5  (Appropriate) | NO |
| 3 | Performing passive mobilization of a joint and finding it painful, defines it as a tenderness joint for RA activity | 8.0  (Appropriate) | NO |
| 4 | To define tenderness (not swelling) of the shoulder, hip, and midtarsal joints for RA activity, to assess passive mobilization of the joint. | 8.5  (Appropriate) | NO |
| 5 | To define tenderness or swelling of a joint to determine RA activity it is perform palpation, if there is pain it is assigned positive for tenderness and if there is edema, effusion or fluctuation, it is assigned swelling | 9.0  (Appropriate) | NO |
| 6 | Ask about the spontaneous pain of a joint to define if it is painful to determine the activity of RA | 8.0  (Appropriate) | NO |
| 7 | Ask about spontaneous pain in the HIP joint to define if it is painful since it is difficult to palpate | 8.0  (Appropriate) | NO |
| 8 | When palpating the joint and if there is doubt about pain or pain gradings (“little pain”, “some pain”) by the patient, it is evaluated as tenderness (since the answer is either YES or NOT ) | 8.5  (Appropriate) | NO |
| 9 | Excessive swelling or excessive thickening without acute signs of joint inflammation (sometimes referred to as "pannus" or "chronic synovitis") is included when evaluating swelling on joint examination for activity in RA | 8.0  (Appropriate) | NO |
| 10 | Joint examination not include evaluation of tenderness when it coexists with fibromyalgia pain in the same patient | 2.5  (No  (Appropriate) | YES |
| 11 | The joint examination includes the evaluation of the pain of the compromised joints when it coexists with neurological alterations that affect the sensitivity of the patient | 6.5  (Uncertain) | YES |
| 12 | The site of the joint where is palpated to determine tenderness or swelling: the joint margin (the area of ​​insertion of the synovial membrane). | 9.0  (Appropriate) | NO |
| 13 | The degree of pressure on the joint is to determine tenderness: it is done until the examiner's nail bed begins to pale (the "Rule of Thumb") | 9.0  (Appropriate) | NO |
| 14 | Consider joint deformity or misalignment from disease damage when determining joint tenderness | 8.0  (Appropriate) | NO |
| 15 | Consider joint deformity or misalignment from disease damage when determining joint swelling | 8.0  (Appropriate) | NO |
| 16 | Explore first for swelling of the joint and then for tenderness, to avoid bias from initial pain. | 6.0  (Uncertain) | NO |
| 17 | Taking into account the position of the patient during the joint examination. | 9.0  (Appropriate) | NO |
| 18 | The order or sequence of the group of joints to be examined, such as: descending, ascending, a lateral hemibody and then the other hemibody, by region, etc. | 8.5  (Appropriate) | NO |
| 19 | A joint is excluded if it has a prosthesis (joint replacement), trauma, or recent surgery when the joint exam is to be performed | 9.0  (Appropriate) | NO |
| 20 | On examination of the temporomandibular joint for pain or swelling: a. press on the joint with the index finger. b. while palpating, the patient is asked to open the mouth | 9.0  (Appropriate) | NO |
| 21 | In the examination of the acromioclavicular joint to examine tenderness or swelling: it is examined with one hand, pressing on the joint with the thumb and the other fingers placed on the back of the patient's shoulder | 9.0  (Appropriate) | NO |
| 22 | In examination the sternoclavicular joint for tenderness or swelling: the joint is pressed with the index finger or thumb | 9.0  (Appropriate) | NO |
| 23 | Technique A for examination of the shoulder or glenohumeral joint: Observation, palpation, and joint movement are performed to assess for tenderness or swelling. a. By careful observation, edema or effusion can be determined. b. tenderness or swelling can be defined by palpation: The thumb is placed over the humeral head at the joint margin and located descending from the coracoid process (approximately 1 cm) and laterally (approximately 1 cm). c. tenderness is determined by a single passive joint movement: the examiner holds the patient's arm slightly flexed and abducts the shoulder from zero to 50 degrees; if it is positive, it is defined that there is pain | 9.0  (Appropriate) | NO |
| 24 | Technique B for examination of the shoulder or glenohumeral joint: To examine for tenderness or swelling: palpate with the thumb over the head of the humerus and at the joint margin, descending from the coracoid process (approximately 1 cm) and laterally (about 1 cm) | 6.5  (Appropriate) | YES |
| 25 | Technique C of the shoulder or glenohumeral joint: to explore for tenderness or swelling, inspection and palpation are performed in two stages. a. joint edema or effusion may be seen on careful inspection. b. palpation assesses for tenderness or swelling: with the thumb on the humeral head, over the joint margin, down from the coracoid process (approximately 1 cm) and laterally (approximately 1 cm) | 6.0  (Uncertain) | YES |
| 26 | Elbow examination technique A to assess for pain or swelling: involves standing behind and to the side of the patient, flexing the elbow 70 to 80 degrees. It is examined with both hands, placing the thumb on the joint, between the olecranon and the lateral epicondyle; and the index fingers in the antecubital fossa. The other hand supports the patient's forearm or hand | 4.5  (Uncertain) | YES |
| 27 | Elbow examination technique B to assess for pain or swelling: involves standing in front of the patient and flexing the elbow 70 to 80 degrees. The joint is palpated with the thumb of one hand between the olecranon and the lateral epicondyle; and with the other hand the patient's forearm or hand is supported | 9.0  (Appropriate) | NO |
| 28 | Examination of the wrist joint for pain or swelling: Examine in a neutral position initially. The dorsal surface is palpated and pressed with the thumbs and the ventral surface with the forefingers, then gentle flexo-extension movements are performed with a range of 10 to 20 degrees ; palpating the proximal and distal joint margin | 9.0  (Appropriate) | NO |
| 29 | Technique A of the metacarpophalangeal joints: “The Two-finger Technique”. Each metacarpophalangeal joint (flexed approximately 50 degrees) is palpated at the left and right anterolateral joint margins (proximal and distal) with the examiner's index finger and thumb, and the other hand supports the patient's hand | 7.0  (Appropriate) | NO |
| 30 | Technique B of the metacarpophalangeal joints: With the patient's hand extended, each joint is palpated with the finger pads of both thumbs at the left and right anterolateral joint margins (proximal and distal), while the other fingers of both hands hold the patient's hand | 9.0  (Appropriate) | NO |
| 31 | Technique C of the metacarpophalangeal joints: "The Four Fingers Technique". The examined finger is held in slight flexion and with the first two fingers (index and thumb) of one hand of the examiner, the joint is palpated at the proximal articular margin; and with the other first two fingers of the examiner's other hand the distal articular margin of the joint is palpated | 4.0  (Uncertain) | YES |
| 32 | Technique B of the metacarpophalangeal joints: With the patient's hand extended, each joint is palpated with the finger pads of both thumbs at the left and right anterolateral joint margins (proximal and distal), while the other fingers of both hands hold the patient's hand | 6.0  (Uncertain) | YES |
| 33 | Proximal and Distal Interphalangeal Joints Technique B: Each proximal and distal interphalangeal joint is examined with the patient's hands semiextended. The medial and lateral (proximal and distal) anterolateral joint margins are palpated with the examiner's thumbs, while the other fingers of both hands support the patient's hand | 8.0  (Appropriate) | NO |
| 34 | Hip Examination Technique A: The patient is not examined directly but is asked about pain in the groin on spontaneous or active movement. If yes, pain in each hip is determined, but no swelling | 4.5  (Uncertain) | NO |
| 35 | Hip Examination Technique B: It is examined with a single passive flexion movement at each hip. If there is pain, it is concluded that there is tenderness in each hip, but no swelling | 6.0  (Uncertain) | YES |
| 36 | Technique C of the hips: The patient is asked about pain in the groin when making spontaneous movements and is also examined with a single passive flexion movement of each hip. If there is pain on questioning or examination, it is concluded that there is tenderness in each hip but no swelling | 6.5  (Uncertain) | NO |
| 37 | When examining the knee joints with technique A. Inspection and palpation is performed in three phases with the knees extended, a. By observing the joint, edema or effusion of the knee is defined. b. Palpating with the index (or ring finger) and thumb of one hand at the midpoint of the medial and lateral (also proximal and distal) tibiofemoral joint margins, defines pain and swelling (both hands may be needed when present). big knees). c. One hand is used to evacuate the suprapatellar recess and check for swelling. While holding the hand in the suprapatellar recess, palpate with the other hand (index finger and thumb) along the patellofemoral joint margins (and medial and lateral recesses); and also, on the patella. This allows to detect joint effusion or edema, if it is positive, there is swelling | 9.0  (Appropriate) | NO |
| 38 | Technique B of examining the knees: The examination is performed in four phases with the knees extended, a. observation defines swelling or edema of the knee. b. by palpation, placing the index (or ring finger) and thumb of one hand at the midpoint of the medial and lateral (both proximal and distal) tibiofemoral joint margins, defines pain, edema, or swelling (may need to use both hands when there are big knees). c. One hand is used to evacuate the suprapatellar recess while, with the other hand, the thumb and middle finger are used along the medial and lateral margins (both proximal and distal) of the patellofemoral joint and the index finger or thumb of the other hand on top of the kneecap. d. a single flexo-extension movement is performed | 5.0  (Uncertain) | NO |
| 39 | Ankle joint examination technique A: It is explored through two maneuvers, a. The index finger or thumb of the examining hand is placed at the joint margin (both proximal and distal) between the tendons of the extensor hallucis longus (extensor hallucis longus tendon) and the extensor digitorum longus (extensor hallucis longus tendon). fingers). b. While palpating, passive flexo-extension mobilization of the joint is performed | 8.0  (Appropriate) | NO |
| 40 | Ankle Joint Technique B: The index finger or thumb of the examining hand is placed at the joint margin (proximal and distal) between the tendons of the extensor hallucis longus (tendon of the extensor hallucis longus) and the extensor digitorum longus (tendon of extensor digitorum longus tendon) | 4.5  (Uncertain) | NO |
| 41 | Technique A of the midtarsal joint: mobilization without palpation. The ankle joint is fixed anteriorly with one hand and with the other hand the middle and thumb fingers are placed on both sides of the midfoot, making inversion and eversion movements. If the patient reports pain, there is tenderness and swelling | 6.5  (Appropriate) | NO |
| 42 | Technique B of the medial tarsal joint. palpated without mobilization: both hands are used to examine the dorsal surface of the midtarsal joint with the thumbs for pain and swelling | 5.0  (Uncertain) | YES |
| 43 | Technique C of the medial tarsal joint by passive mobilization and palpation: the ankle joint is fixed anteriorly with one hand and with the other hand, the index, middle and thumb fingers are placed on both sides of the midfoot making movements investment and eversion. In addition, both hands are used to palpate the dorsal surface of the medial tarsal joint with the thumbs. | 7.5  (Appropriate) | NO |
| 44 | When examining the metatarsophalangeal or interphalangeal joints with technique A by palpation without passive mobilization: each joint is examined separately with the index finger on the dorsal surface and the thumb on the ventral surface, palpating the superior and inferior margins (both proximal and distal) | 6.5  (Appropriate) | YES |
| 45 | Technique B of examining the metatarsophalangeal or interphalangeal joints with palpation and passive mobilization. a. each joint is examined separately, with the index finger of the examining hand on the dorsal surface and the thumb on the ventral surface, palpating the superior and inferior margins (both proximal and distal). b. While palpating, passive flexoextension movements of the joint are performed. | 8.0  (Appropriate) | NO |
| IPR: Inter-percentile range. IPRAS: Inter-percentile range adjusted for symmetry. | | | |

**Appendix 3.** Result of the third round of qualifications

| **Item No.** | **Statement** | **Median appropriateness**  **rating** | **Disagreement IPR>IPRAS** | **Declared Definitive** |
| --- | --- | --- | --- | --- |
| 16 | It is important to first examine for swelling or edema of a joint and then examine for joint tenderness to avoid initial tenderness bias. | 2.5  (NO) | YES | NO |
| 29 | Technique A of the metacarpophalangeal joints: "The Two Finger Technique". Palpation with the index finger and thumb at each metacarpophalangeal joint (flexing approximately 50 degrees) and at the lateral and medial anterior joint margins (both proximal and distal). With the other hand, holding the patient's hand | 1.0  (NO) | NO | NO |
| 30 | Technique B for examining the metacarpophalangeal joints: With the patient's hand extended, each joint is palpated with both thumbs at the lateral and medial anterior joint margins (both proximal and distal), while the other fingers of both hands hold the patient's hand | 9.0  (YES) | NO | YES |
| 34 | Hip examination technique A: The joint is not examined directly and questions are asked about pain in the groin with spontaneous or active movements. If positive, pain in each hip is determined, but no swelling | 1.0  (NO) | NO | NO |
| 36 | Technique C of examining the hips: the patient is asked about pain in the groin with spontaneous or active movements; and in addition, it is examined with a single passive hip flexion movement. If there is pain on questioning or examination, it is concluded that there is pain in each hip, but no edema | 9.0  (YES) | NO | YES |
| IPR: Inter-percentile range. IPRAS: Inter-percentile range adjusted for symmetry. | | | |  |
